# Supplementary material for: Structure and IR Spectra of 3(5)-Aminopyrazoles and UV-Induced Tautomerization in Argon Matrix
Source: MDPI journal article supplement (doi:10.3390/molecules26144299), 2021-07-15
Supplement: s1 [file s1]

# Structure and IR Spectra of 3(5)-Aminopyrazoles and UV-Induced Tautomerization in Argon Matrix

Alina Secrieru <sup>1,2</sup>, Susy Lopes <sup>3\*</sup>, Maria L. S. Cristiano <sup>2</sup> and Rui Fausto <sup>3</sup>

<sup>1</sup> CCMAR and Department of Chemistry and Pharmacy, FCT, University of Algarve, Campus de Gambelas, 8005-039 Faro, Portugal; asecrieru@ualg.pt (A.S); mcristi@ualg.pt (M.L.S.C)

<sup>2</sup> Department of Chemistry, University of Liverpool, Liverpool L69 7ZD, United Kingdom;

<sup>3</sup> CQC-IMS, Department of Chemistry, University of Coimbra, 3004-535 Coimbra, Portugal; susylopes@qui.uc.pt (S.L); rfausto@ci.uc.pt (R.F)

\* Correspondence: susylopes@qui.uc.pt

## INDEX

**Table S1.** TD-DFT(B3LYP)/6-311++G(d,p) calculated transition energies (to the 6 lowest singlet excited states) of the 3AP tautomer and oscillator strengths.

**Figure S1.** Simulated UV spectrum of the 3AP tautomer obtained from TD-DFT calculation at the DFT(B3LYP)/6-311++G(d,p) level of theory.

**Table S1** – TD-DFT(B3LYP)/6-311++G(d,p) calculated transition energies (to the 6 lowest singlet excited states) of the 3AP tautomer and oscillator strengths.

| State          | Symmetry | Energy/ nm | Oscillator<br>Strength | Approximate description |
|----------------|----------|------------|------------------------|-------------------------|
| S <sub>1</sub> | A        | 257.5      | 0.0050                 | HOMO → LUMO             |
| S <sub>2</sub> | A        | 250.2      | 0.0003                 | HOMO → LUMO +1          |
| S <sub>3</sub> | A        | 223.6      | 0.0354                 | HOMO → LUMO +2          |
| S <sub>4</sub> | A        | 222.0      | 0.0147                 | HOMO → LUMO +3          |
| S <sub>5</sub> | A        | 214.3      | 0.0048                 | HOMO –1 → LUMO          |
| S <sub>6</sub> | A        | 207.7      | 0.0024                 | HOMO → LUMO +4          |

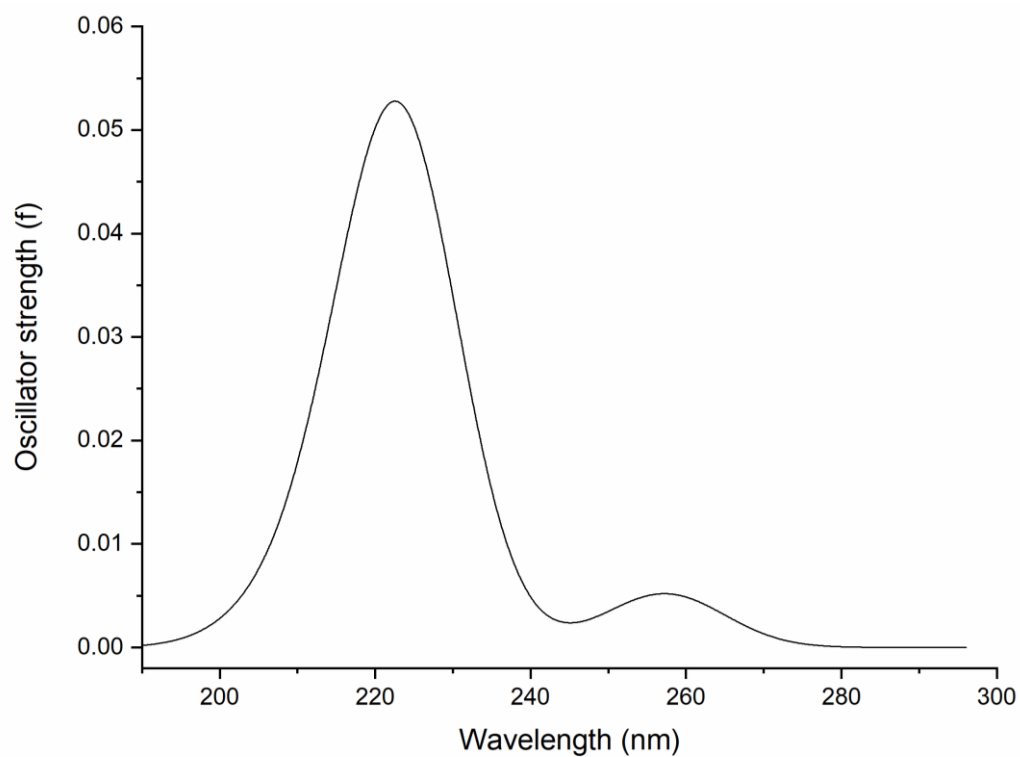

**Figure S1.** Simulated UV spectrum of the 3AP tautomer obtained from the TD-DFT(B3LYP)/6-311++G(d,p) calculations. A band width at half-height of 17.9 nm was used to simulate the spectrum.
